# Supplementary material for: Corrosion behavior of Limnoperna fortunei on carbon steel in freshwater environments
Source: Research Square preprint supplement (doi:10.21203/rs.3.rs-5751902/v1), 2025-01-08
Supplement: Supplementary file 1 [file 3b9142113216d63dbc1541bb.docx]

# Corrosion behavior of *Limnoperna fortunei* on carbon steel in freshwater environments

Yuhan Liua, c, Xiaoyan Hea, b, c, Ying Yangd, Xianfu Yuanb, c, Ziquan Zhoub, c,

Xiuqin Baia, b, c*, Chengqing Yuana, b

a Hubei Longzhong Laboratory, Xiangyang 441000, Hubei, China

b State Key Laboratory of Maritime Technology and Safety, Wuhan University of Technology, Wuhan 430063, China

c School of Transportation and Logistics Engineering, Wuhan University of Technology, Wuhan 430063, China

d School of Pharmacy and Bioengineering, Keele University, Staffordshire ST5 5BG, UK

**Corresponding author:** Xiuqin Bai **Email:** xqbai@whut.edu.cn (XB)

**Affiliation:** State Key Laboratory of Maritime Technology and Safety, Wuhan University of Technology, Wuhan 430063, China

**Tel./ Mobile Number (Mandatory):** +86 138-7120-3123 **Fax:** none


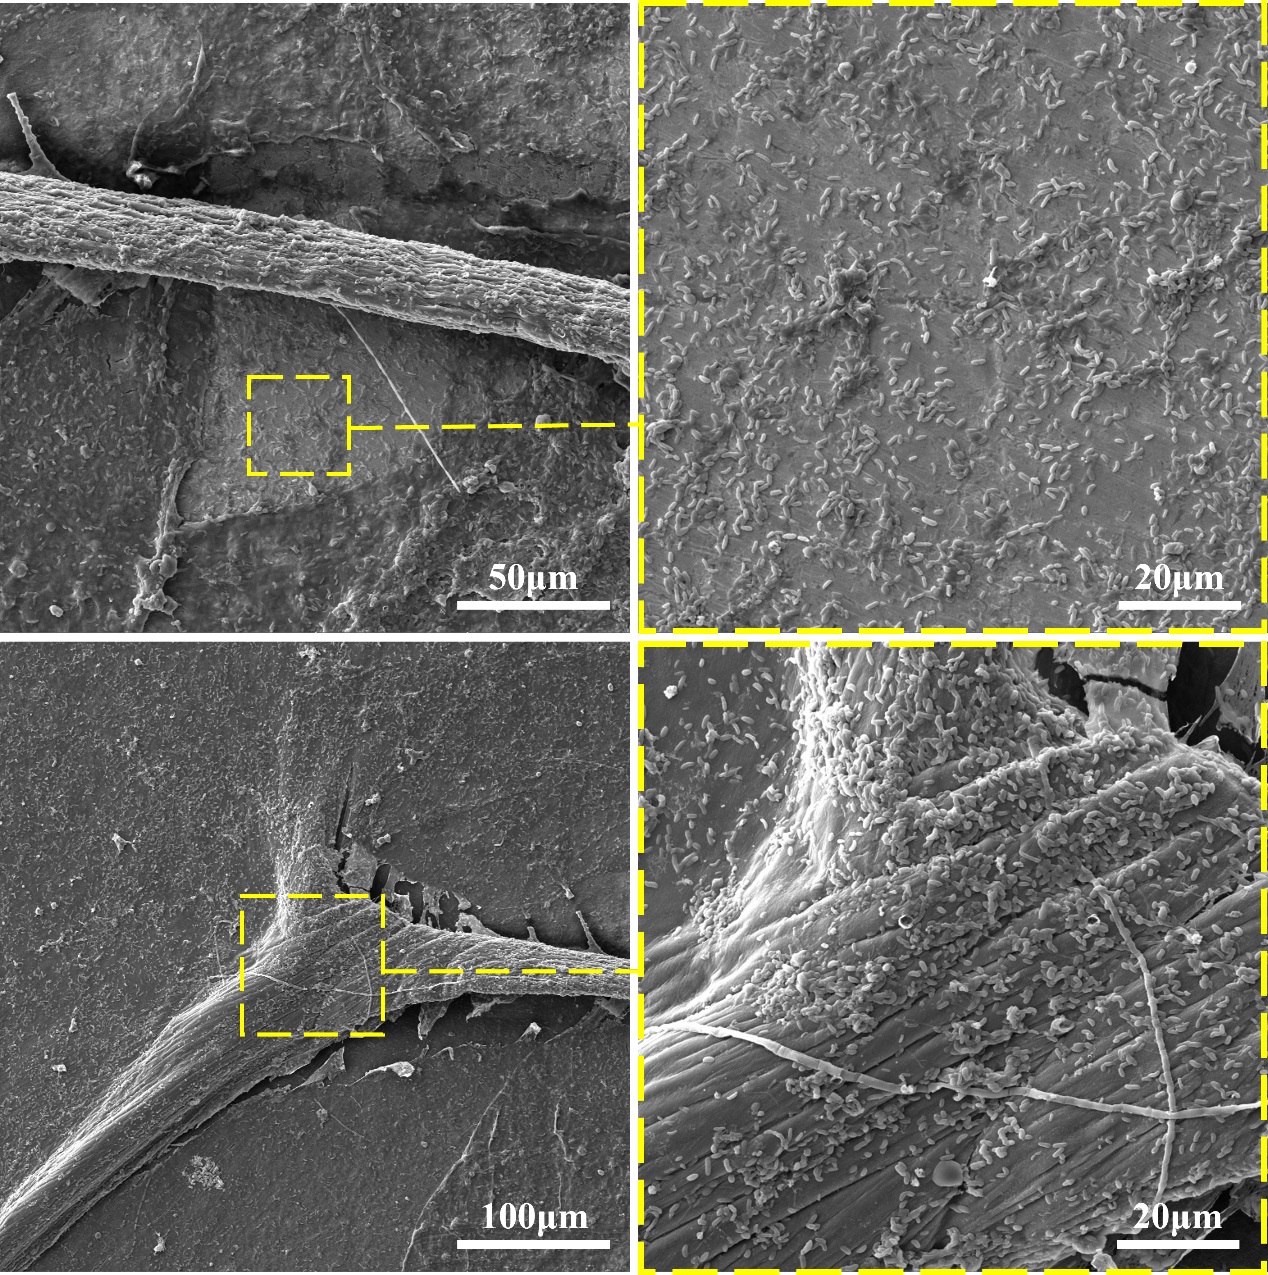


Fig. S2 SEM images showing the massive proliferation of bacteria on the substrate surface following mussel mortality.


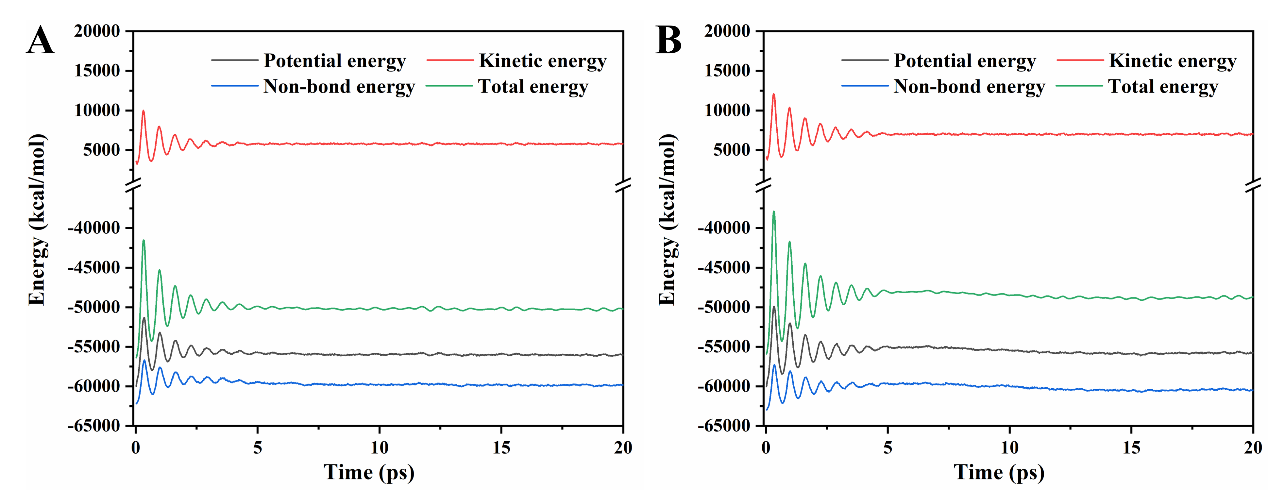


Fig. S3 Energy variation curves over time during the 20 ps pre-equilibration process for systems without (A) and with polypeptides (B).
